# Supplementary material for: Non-Coding RNAs Participate in the Regulation of CRY-DASH in the Growth and Early Development of Saccharina japonica (Laminariales, Phaeophyceae)
Source: PubMed Central journal article supplement (PMC6981881; doi:10.3390/ijms21010309), 2020-01-02
Supplement: ijms-21-00309-s001.pdf [file ijms-21-00309-s001.pdf]

# Supplementary Materials

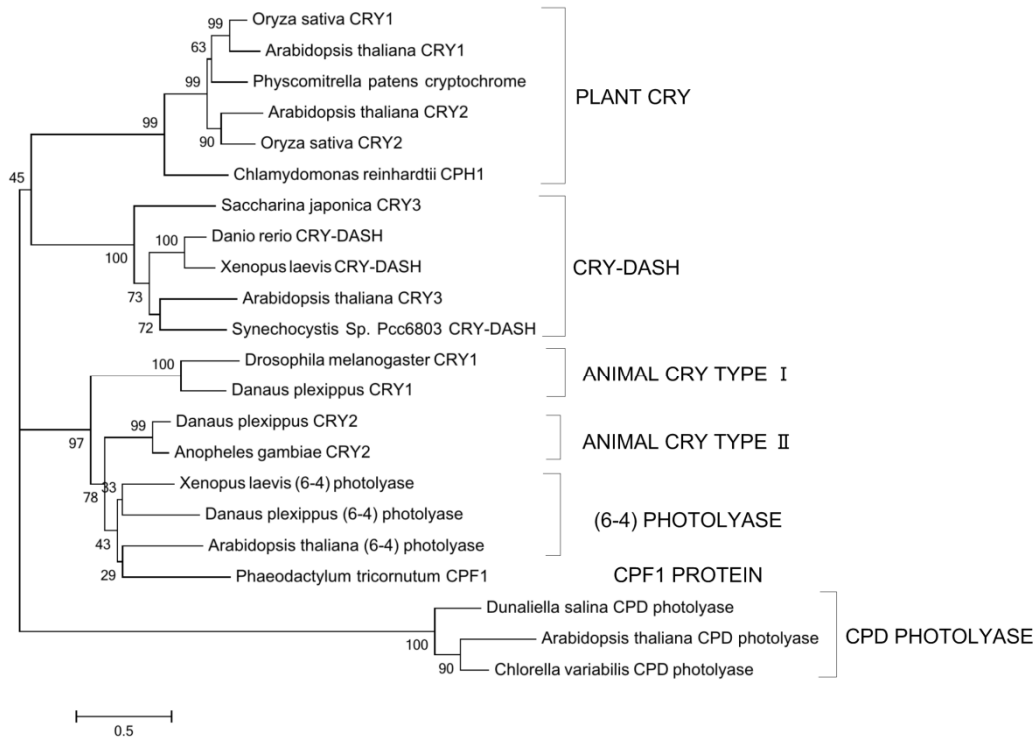

**Figure S1.** Phylogenetic analysis of CRY-DASHs. In total, 22 protein sequences were used to perform phylogeny analysis using the MEGA 6.0 platform with the neighbor-joining method. Bootstraps of 1000 replicates are expressed in percentage.

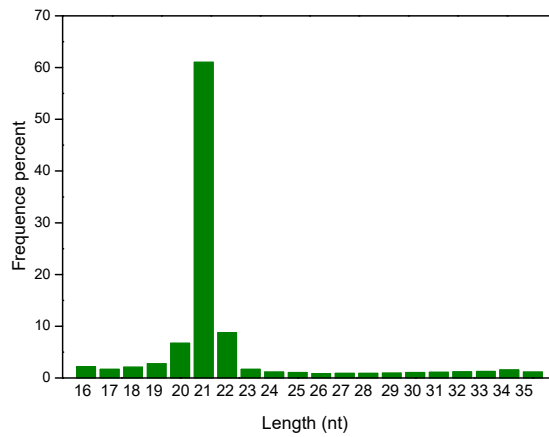

**Figure S2.** Length distributions of small RNAs in *S. japonica*.

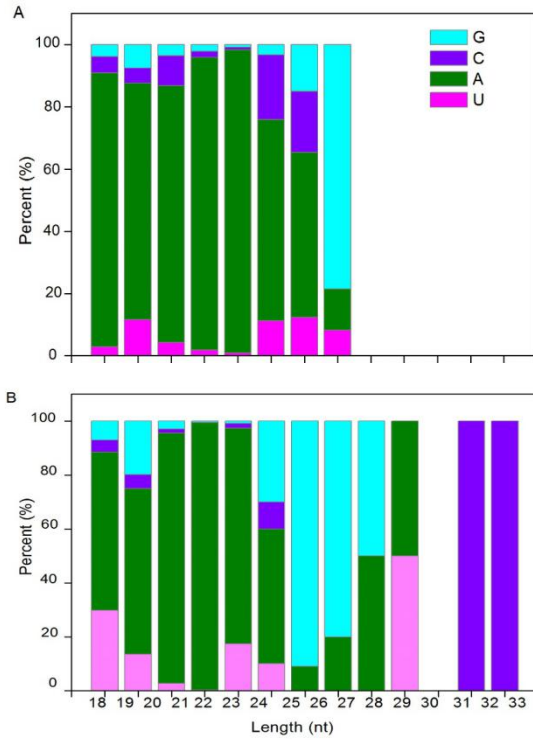

**Figure S3.** Base bias on the first site of novel (A) and known (B) miRNAs with specific lengths.

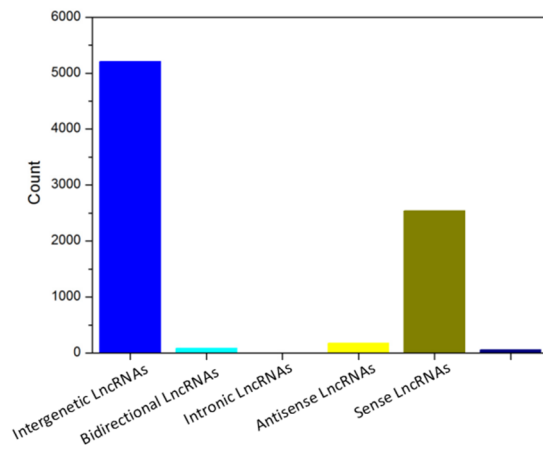

**Figure S4.** Classification of lncRNA based on their position.

**Table S1.** Summary of small-RNA seq reads mapping to *S. japonica* reference genome. The suffixes -1, -2 indicate biological replicates for each sample.

| Sample | Total Reads | Match Reads | Ratio  |
|--------|-------------|-------------|--------|
| sjDR-1 | 17021748    | 12137953    | 71.31% |
| sjDR-2 | 14696034    | 10186706    | 69.32% |
| sjBL-1 | 13404621    | 9518639     | 71.01% |
| sjBL-2 | 13674165    | 9969389     | 72.91% |
| sjWL-1 | 13199760    | 9539465     | 72.27% |
| sjWL-2 | 9352909     | 6478724     | 69.27% |

**Table S2.** Summary of lncRNA library reads mapping to the reference genome of *S. japonica* in strand-specific RNA-seq library. The suffixes-1, -2 indicate biological replicates for each sample.

| Sample | Total reads | Match reads | Ratio  |
|--------|-------------|-------------|--------|
| sjDR-1 | 86003128    | 77156097    | 89.71% |
| sjDR-2 | 93901340    | 80952915    | 86.21% |
| sjBL-1 | 104039374   | 95201422    | 91.51% |
| sjBL-2 | 86321882    | 80310174    | 93.04% |
| sjWL-1 | 113955214   | 104651692   | 91.84% |
| sjWL-2 | 78715228    | 71700462    | 91.09% |

**Table S3.** List of primers used in the study.

| Primer           | Sequence (5' to 3')                             | Description                   |
|------------------|-------------------------------------------------|-------------------------------|
| CRY-DASH-5O      | CCCCAAGTGGAATATGGAGTTGCCATTC                    | 5' RACE                       |
| CRY-DASH-5I      | CCCGCCGTCTCGCCCCCTTGAA                          | 5' RACE                       |
| CRY-DASH-3O      | CAAGGAGGTCTGGGGCAATG                            | 3' RACE                       |
| CRY-DASH-3I      | CTGCCTTCCGACTTGCCGTT                            | 3' RACE                       |
| CRY-DASH-F       | CATATGATGGCGAGCTTTTCATCTGA                      | ORF amplification             |
| CRY-DASH-R       | GAATTCCTAGGAAAACCTGCCGAAACG                     | ORF amplification             |
| qCRY-DASH-F      | AATGGAGGTCCGGGAAGTAC                            | qRT-PCR for <i>SjCRY-DASH</i> |
| qCRY-DASH-R      | CCCCAAGTGGAATATGG                               | qRT-PCR for <i>SjCRY-DASH</i> |
| Actin-F          | GACGGGTAAGGAAGAACGG                             | qRT-PCR for $\beta$ -actin    |
| Actin-R          | GGGACAACCAAAACAAGGGCAGGAT                       | qRT-PCR for $\beta$ -actin    |
| U6-F             | TCGGGGACATCCGATAAAATTGGAA                       | qRT-PCR for <i>U6</i>         |
| U6-R             | GGACCATTT-CTCGATTTATGCGTGTCA                    | qRT-PCR for <i>U6</i>         |
| novel-m3234-5p   | CTCAACTGGTGTCTGGAGTCCGGCAATT<br>CAGTTGAGCCGGTAG | RT-primer                     |
| novel-m3234-5p-F | GCCGAGTCCAGCCCGGCGTT                            | qRT-PCR for novel-m3234-5p    |
| novel-m3234-5p-R | CTCAACTGGTGTCTGGGA                              | qRT-PCR for novel-m3234-5p    |
| TCONS_00001280-F | TAGTGCAATTCGGTCCCCCTT                           | qRT-PCR for TCONS_00001280    |
| TCONS_00001280-R | ACCAAGCCCGTACCAACTCT                            | qRT-PCR for TCONS_00001280    |
| TCONS_00002718-F | AGCGCACTGCTGTAATACTAAGTGC                       | qRT-PCR for TCONS_00002718    |
| TCONS_00002718-R | TCACTTGTTTCGCGTCCACGTTG                         | qRT-PCR for TCONS_00002718    |
| TCONS_00006247-F | AGCTCCACGCACGTTATTCTTCAG                        | qRT-PCR for TCONS_00006247    |
| TCONS_00006247-R | AATGACACAGCAGTACCACGACAG                        | qRT-PCR for TCONS_00006247    |
| TCONS_00008286-F | CGTGACGACTCCACATTCCA                            | qRT-PCR for TCONS_00008286    |
| TCONS_00008286-R | GCGTGGTAATCCGGTTGAA                             | qRT-PCR for TCONS_00008286    |
| TCONS_00017519-F | TGCTGCGATGACCTGAACTAAGTGC                       | qRT-PCR for TCONS_00017519    |
| TCONS_00017519-R | TGGTGCAGTTGGTGTAAACAGGTAC                       | qRT-PCR for TCONS_00017519    |
| TCONS_00009907-F | GACGACGACGTATGGATTGGAACC                        | qRT-PCR for TCONS_00009907    |
| TCONS_00009907-R | TAGCTCTGCCGCCGAACATCTAG                         | qRT-PCR for TCONS_00009907    |
| TCONS_00043396-F | ACGATTACAAGGTGGCACGG                            | qRT-PCR for TCONS_00043396    |
| TCONS_00043396-R | CTGTTTGCTCGGCTGGCAT                             | qRT-PCR for TCONS_00043396    |
| TCONS_00043393-F | TCAGAGAGTGACAGCAAGGCGG                          | qRT-PCR for TCONS_00043393    |
| TCONS_00043393-R | CGCCCCGGGTTGAGCTTTAC                            | qRT-PCR for TCONS_00043393    |
| TCONS_00008371-F | GGCTGACGCCGCTCGCTA                              | qRT-PCR for TCONS_00008371    |
| TCONS_00008371-R | GCATCCCGAGCATGTTTTGCA                           | qRT-PCR for TCONS_00008371    |

### Phylogenetic Analysis

Alignments of cryptochrome and photolyase protein sequences were performed with the ClustalW algorithm using the following parameters: for pairwise alignments, a gap opening penalty of 10 and a gap extension penalty of 0.1. For multiple alignments, a gap opening penalty of 10 and a

gap extension penalty of 0.2 were used. A Gonnet weight matrix was used with residue-specific penalties ON, hydrophilic penalties ON, a gap separation distance of 4, end gap separation OFF, negative matrix OFF, and a delay divergent cutoff of 30%. A phylogenetic tree was constructed by the neighbour-joining method [1], and a bootstrap consensus tree was obtained after 1000 replications. Parameters were set as follows: Poisson correction model, complete deletion of gaps/missing data, and uniform rates among sites.

## Reference

1. Saitou N, and Nei M. The neighbor-joining method: A new method for reconstructing phylogenetic trees. *Mol. Biol Evol.* 1987; 4:406-425.
